# Supplementary material
Source: Springer Nature journal article supplement (https://www.springermedizin.de/resource/supplementary/13550_2012_146_MOESM6_ESM.pdf/9687644)

A

B

C

1

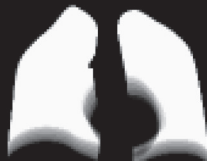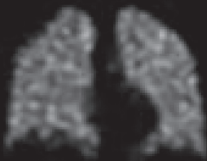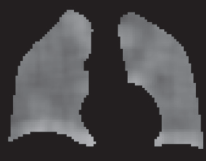

2

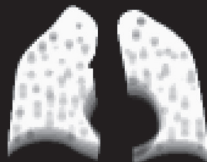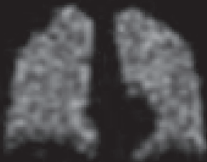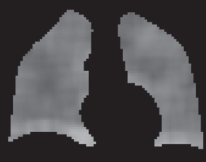

4

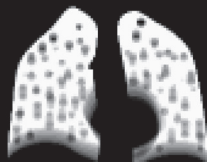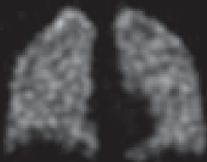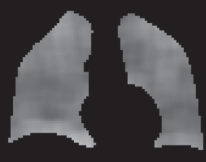

5

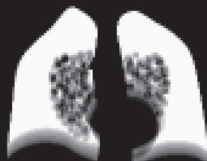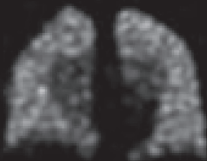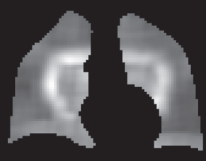

7

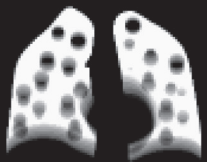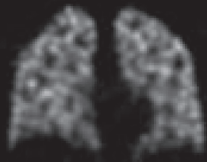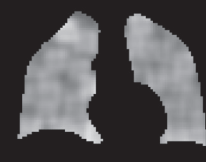

0%

180%

Supplement: MOESM6 [file 9687644]
